# Supplementary material for: The long-term outcome of childhood nephrotic syndrome in Germany: a cross-sectional study
Source: Springer Nature journal article supplement (doi:10.1007/s10157-019-01696-8), 2019-02-05
Supplement: MOESM2 [file 16444084]

**Table 9S** Immunosuppressive treatment of patients with steroid sensitive nephrotic syndrome.

|  | **N** | **Mean** | **Range** | **SD** | **Unit** |
| --- | --- | --- | --- | --- | --- |
| **Steroids** | 43 | 745 | 51 to 3796 | 753 | mg/kg |
| **Cyclophosphamide** | 11 | 210 | 104 to 457 | 110 | mg/kg |
| **Cyclosporine A** | 5 | 8105 | 128 to 17099 | 7850 | mg/kg |
| **Chlorambucil** | 6 | 8.1 | 6 to 9 | 1.1 | mg/kg |
| **Mycophenolate mofetil** | 3 | 23670 | 9650 to 30950 | 12145 | mg/kg |
